# 1        **Knowledge, Attitude and Practice (KAP) study on** 2        **COVID-19 among the general population of Nepal**

3        Salina Shrestha<sup>1</sup>, Rabin Malla<sup>1\*</sup>, Sadhana Shrestha<sup>1,2</sup>, Pallavi Singh<sup>3</sup> and Jeevan B. Sherchand<sup>4,5</sup>

4        <sup>1</sup>Center of Research for Environment, Energy and Water, Kathmandu, Nepal

5        <sup>2</sup>United Nation University- Institute for the Advanced Study of Sustainability, Tokyo, Japan

6        <sup>3</sup>Nepal Red Cross Society, Head Office, Kathmandu, Nepal

7        <sup>4</sup>Tribhuvan University, Institute of Medicine, Research Directorate, Kathmandu, Nepal

8        <sup>5</sup>Nepal Health Research Council, Government of Nepal, Ethical Review Board, Kathmandu, Nepal

9        \* Corresponding author

10       E-mail: [rabin@creew.org.np](mailto:rabin@creew.org.np)

11

## 12       **Abstract**

13       The COVID-19 pandemic has become one of the global health challenges in the current context. In Nepal,  
14       the first confirmed case was reported on 23 January 2020, and since then it has resulted in several negative  
15       impacts including economic disruption and deterioration of physical and mental health. In such a pandemic,  
16       it is indispensable to understand the knowledge and behavioral patterns of the general population regarding  
17       COVID-19. Therefore, our study aimed to assess the knowledge, attitude and practice on COVID-19,  
18       among the general population and its relationship with socio-demographic conditions.

19       The questionnaire survey was conducted to collect data from eight districts of Nepal which included  
20       Kathmandu, Bhaktapur, Lalitpur, Morang, Sunsari, Rupandehi, Chitwan, and Kaski. Descriptive statistics,

21 parametric and non-parametric statistical tests, and a logistic regression model were used for analysis. The  
22 study showed that 93.3% of respondents had knowledge of overall preventive practice whereas only 32%  
23 had knowledge of overall symptoms of COVID-19. Regarding attitude, only 14.3% believed that they will  
24 get rid of COVID-19 soon. The preventive practice was reduced after lockdown compared to that during  
25 lockdown. The respondents with white-collar occupations, high-income, and unmarried were good at KAP.  
26 Similarly, highly educated and those residing in urban areas had good knowledge and practice.  
27 The study findings will help in the development of targeted programs to improve the knowledge, attitude,  
28 practice of the general population on COVID-19, which is of paramount importance to deal with the existing  
29 pandemic and also such possible future waves of the pandemic.

30

## 31 **1. Introduction**

32 Coronavirus disease 2019 (COVID-19) is an infectious disease first identified in Wuhan, China's Hubei  
33 Province in December 2019 (1). The World Health Organization (WHO) declared this disease a Public  
34 Health Emergency of International concern on January 30, 2020, and later declared it a pandemic on March  
35 11, 2020 (2). Now, it has been reported in almost all the countries worldwide. Nepal first confirmed the  
36 case of COVID-19 on 23 January 2020 (3).

37 Prevention and control of the spread of COVID-19 is still a challenge in the current context of emerging  
38 new variants of severe acute respiratory syndrome coronavirus -2 (SARS-CoV-2). Though a vaccine has  
39 been developed which can reduce the transmission and risk of severity of the disease but cannot stop the  
40 transmission. Moreover, the spread of disease is highly dependent on the habit of practicing preventive  
41 measures such as personal hygiene, social distancing, use of masks, etc. Hence, following these preventive  
42 measures properly along with vaccination is more effective to reduce the vulnerability of the population as  
43 well as the morbidity and mortality rates for building disaster resilient society (4-7).

44 The Nepal government in collaboration with other stakeholders, are conducting various activities such as  
45 preparation of Information, Education, Communication (IEC) material, and disseminate information to  
46 spread knowledge about COVID-19, through various medium such as social media, TV, radio, and mobile  
47 phone but the dissemination of knowledge to the community are still not satisfactory. Many of the  
48 marginalized and poor communities do not have access to these sources (8-11). In addition, the people  
49 having access to these sources of media are also not able to choose the authentic and correct information  
50 due to the lack of digital literacy as much of the misleading information on COVID-19 is also circulated  
51 through these sources (12). The absence of proper coordination, well-planned, and clearly defined roles and  
52 responsibilities of 3 tiers of government (local, provincial, and federal) regarding the COVID-19 pandemic  
53 have also affected the timely and efficient implementation of preventive measures (13). Lack of timely  
54 information to improve knowledge and preventive behavior on dealing with the crisis during a pandemic  
55 can further create anxiety and fear of being discredited and treated unfairly. Consequently, the general  
56 public might be reluctant to get tested which further delays the treatment with a large number of populations  
57 remaining undiagnosed (14, 15). Therefore, early identification of symptoms and timely treatment are very  
58 important in this scenario to control the spread of disease and fast recovery.

59 The lengthening of the pandemic might result in unprecedented challenges such as economic disruption,  
60 loss of jobs and business, and an increase in domestic violence among the general population (16-18). This  
61 would ultimately affect physical health such as discomfort, pain, lack of physical activities, and a sedentary  
62 lifestyle leads to weight gain and an increase the risk of cardiovascular disease, mental health such as  
63 depression as well as spiritual health (19-22). The large number of mutations and emergence of several  
64 variants of the concern (VOCs) of SARS CoV-2 is highly probable in the future as well with increased  
65 transmissibility, damaging effect on human health, and increased risk of hospitalization (23). In such  
66 circumstances, Nepal's health care system is fragile to handle an extensive increase in morbidity rates  
67 during the pandemic. Also, delivering quality health care service is very tough and challenging compared  
68 to other developed countries due to the limited resources such as skilled human resources, infrastructures,

69 and equipment. Although, the total health budget was increased by Nepal Government during pandemic in  
70 fiscal years 2020/21, 2021/22, the decrease in allocation of budget to hospitals and academics compared to  
71 previous fiscal years have aggravated the situation (24-26). In addition, the occurrence of high  
72 comorbidities further intensifies the complications resulting in high mortality (27-29).

73 In such situations, it is very important to understand what is known, what is believed and accepted, and  
74 what is done regarding the preventive measures concerning COVID-19. The necessity of a high level of  
75 psychological readiness i.e., belief and acceptance towards the severity of disease particularly for  
76 behavioral change (30) increased the importance of the study. In addition, previous studies conducted on  
77 Ethiopia (31, 32), Bangladesh (33, 34), Turkey (35), China (36, 37), Malaysia (38), Iran (39), Indonesia  
78 (40) and Cameroon (41) regarding knowledge, attitude and practice (KAP) on COVID-19 also provided  
79 substantiation of clear understanding of these concerns further underscored the significance of the study.  
80 However, there are limited studies regarding KAP on COVID-19 among general population in context of  
81 Nepal. Therefore, our study aims to observe the situation of knowledge, attitude and practice (KAP) on  
82 COVID-19 among the general population, and its relationship with socio-demographic characteristics. The  
83 study results will help to comprehend the knowledge gap and behavioral patterns that are important to  
84 prioritize the policy and allocate the resources for the implementation of intervention programs to address  
85 the challenges of the COVID-19 pandemic.

## 86 **2. Methodology**

### 87 **2.1 Study area and sampling**

88 The cross-sectional study was conducted among the general population above the age of 18 years from  
89 eight districts- Kathmandu, Bhaktapur, Lalitpur, Morang, Sunsari, Rupandehi, Chitwan, and Kaski of Nepal  
90 (Figure 1). A descriptive study design was used for analyzing the survey data. A convenient non-probability  
91 sampling method with a total sample size of 702 was considered due to the inappropriateness of the  
92 probability sampling during the period of the pandemic.

93 **Fig 1: Districts selected for sampling**

94

95 The number of samples in each of the eight selected districts was determined according to the proportion  
96 of the population of the districts. The sample size for each district was calculated as follows:

97 Proportion of population in each district (A) = (Population of a district)/ (Total population of all eight  
98 districts) ×100%.

99 Sample size of each district (n) = (A)/100×Total sample size (702).

100 Hence, the number of participants selected in each district were Kathmandu-197, Bhaktapur-35, Lalitpur-  
101 5, Morang-107, Sunsari-88, Rupandehi-99, Chitwan-66, and Kaski-56.

102

103 **2.2 Data collection**

104 For data collection, we used a mixed method approach which included phone survey and face to face  
105 interview as it was difficult to interact and collect all the samples employing only one approach during the  
106 pandemics. Skilled volunteers associated with Nepal Red Cross Society (NRCS) district chapters were  
107 mobilized to conduct surveys.

108

109 **2.3 Ethical concern**

110 The study was approved by the Ethical Review Board of the Nepal Health Research Council. The verbal  
111 and written Informed consent were taken from all the respondents who participated in the study through  
112 telephone survey and face to face interview respectively.

113

114 **2.4 Measurements**

115 **Knowledge, attitude, and practice (KAP)**

116 Knowledge level was measured using binary questions (yes/ no). Knowledge of symptoms, preventive  
117 measures, quarantine, and overall knowledge was assessed using a different number of questions. Thirteen  
118 questions assessed the knowledge of ‘symptoms’ with a total score range of 0-13. The knowledge of  
119 symptoms was dichotomized with a cutoff value of 10 as those having good knowledge ( $>10$ ) and poor  
120 knowledge ( $\leq 10$ ). There were six questions related to knowledge on ‘preventive measures’ with total score  
121 in the range 0-6. The knowledge on preventive measures was dichotomized with cutoff value of 6 as having  
122 good and poor knowledge. Similarly, five questions related to knowledge on ‘precondition to stay in  
123 quarantine’ with the total score in the range of 0-5 were categorized as having good and poor knowledge  
124 with a cutoff value of 5. Lastly, there were twelve final questions to measure the ‘overall knowledge’ level  
125 of the general population ranging from 0-12 with a cutoff value of 7.

126  
127 Attitude level was measured using a five-point Likert Scale questions where the responses varied from (1)  
128 strongly disagree to (5) strongly agree. The total score of the attitude questionnaire was the sum of scores  
129 of all the items ranging from 6 to 30 which was categorized into good and a bad attitude with a cutoff value  
130 of 26. Practice level was measured using a five-point Likert Scale questionnaire for prevention of COVID-  
131 19 from (1) never to (5) always. The total score of practice questionnaires ranging from 9 to 45 was  
132 categorized as good practice and poor practice with a cut-off value of 33.

133

## 134 **Socio-demographic characteristics**

135 The structured questionnaire was used to collect the data on socio-demographic characteristics such as  
136 geographical location (rural municipality, urban municipality), gender (male, female), age ( $<20$  years, 20-  
137 30 years, 31-40 years, 41-50 years,  $>50$  years), marital status (married, unmarried), education (no education,  
138 literate, basic education, secondary education, undergraduate, graduate and above), income ( $<$ NPR 5000,  
139 NPR 5000-10,000, NPR 10,000-15,000, NPR 15,000-20,000, NPR  $>20,000$ ), occupation of the respondent

140 (white-collar occupation - service, business, house rent; blue-collar occupation-agriculture, labor; and  
141 others - self-employed, remittance and others).

142

## 143 **2.5 Statistical analysis**

144 Descriptive statistics were used to calculate frequencies, proportions, and averages. Chi-square test was  
145 used to find the relationship between categorical variables. Similarly, the Wilcoxon Rank Test was used for  
146 continuous variables. The reliability of the questionnaire used to measure knowledge, attitude, and practice  
147 was evaluated using Cronbach's Alpha. The alpha value of 0.6 is considered as acceptable. A multivariate  
148 logistic regression model was used to find the relationship of KAP with socio-demographic characteristics.  
149 Statistical analyses were conducted using Statistical Package for the Social Sciences V.19 (SPSS Inc,  
150 Chicago, Illinois, USA).

151

## 152 **3. Results**

### 153 **3.1 Knowledge**

154 The study revealed that, very few proportions of respondents had knowledge of the symptoms of diarrhea  
155 (n = 258, 37%), conjunctivitis (n = 159, 22.9%), skin rashes or discoloration of skin or toes (n = 172,  
156 24.7%), loss of speech or movement (n = 313, 45%) whereas, a higher proportion of respondents had  
157 knowledge on fever (n = 699, 99.7%), dry cough 680, 97%), tiredness (n = 634, 90.3%), aches and pains  
158 (n = 630, 89.9%), sore throat (n = 622, 88.6%), headache (n = 620, 88.8%), loss of taste and smell (n = 651,  
159 92.9%), difficulty breathing and shortness of breath (n = 654, 93.4%), and chest pain (n = 557, 80%) (Figure  
160 2).

161

162 **Fig 2: Knowledge of symptoms of the COVID-19 pandemic among the respondents**

163 Regarding the preventive measures, a higher proportion of respondents showed good knowledge of the  
164 necessity of washing hands or use of alcohol-based sanitizer (n = 692, 98.6%), covering of nose and mouth  
165 while sneezing and coughing (n = 700, 99.7%), maintaining social distance (n = 683, 97.3%), use of mask  
166 (n = 698, 99.4%), avoiding crowd (n = 691, 98.4%), and staying home (n = 677, 96.6%) (Figure 3).

167

### 168 **Fig 3: Knowledge of prevention on COVID-19 among the respondents**

169

170 Similarly, higher proportion of respondents had knowledge of pre-conditions to stay in quarantine such as  
171 contact with droplets while sneezing and coughing 675 (96.4%) followed by taking care of an infected  
172 person within house (n = 649, 93%) and using utensils of infected person (n = 630, 90.4%) (Figure 4).

173

### 174 **Fig 4: Knowledge of pre-condition to stay in quarantine among the respondents**

175

176 Considering the knowledge of comorbidities during the COVID-19 pandemic, many of the respondents had  
177 knowledge of asthma (n = 568, 81.3%), followed by cardiovascular symptoms (n = 511, 73%), while very  
178 few had knowledge of cerebrovascular disease (n = 292, 41.8%) (Figure 5).

179

### 180 **Fig 5: Knowledge of comorbidities during the COVID-19 pandemic among the respondents**

181

182 Table 1 comprising the overall knowledge on COVID-19 further revealed that a major proportion of  
183 respondents (n = 655, 93.3%) had good knowledge about overall preventive measures regarding COVID-  
184 19. However, very few respondents had overall knowledge of symptoms (n = 221, 32%) and comorbidities  
185 (n = 283, 40.7%). Similarly, (n = 466, 67.1%) of respondents had overall knowledge of the pre-condition  
186 of quarantine. Concerning the knowledge of survival of SARS CoV-2 in fomites, (n = 375, 53.6%) knew



187 about its survival duration on plastic and stainless steel, (n = 280, 40%) on cardboard, (n = 306, 43.7%) on  
 188 copper, and (n = 352, 50.2%) on aerosols.

189 **Table 1. Knowledge level of respondents on COVID-19**

| S.N. | Items                                                                                                                      | Yes (%)     |
|------|----------------------------------------------------------------------------------------------------------------------------|-------------|
| K1   | Do you have good knowledge of the overall symptoms of COVID-19 as mentioned by WHO?                                        | 221 (32%)   |
| K2   | Do you have good knowledge of preventive measures to be protected from COVID-19?                                           | 655 (93.3%) |
| K3   | Do you have good knowledge of pre-conditions to stay in quarantine?                                                        | 466 (67.1%) |
| K4   | Do you know a proper diet and exercise to boost the immune system?                                                         | 653 (93.4%) |
| K5   | Do you know SARS-CoV-2 can transfer from aerosols?                                                                         | 429 (61.5%) |
| K6   | Do you know SARS-CoV-2 will stay alive for seventy-two hours in plastic, and stainless steel?                              | 375 (53.6%) |
| K7   | Do you know SARS-CoV-2 will stay alive for twenty-four hours in cardboard?                                                 | 280 (40%)   |
| K8   | Do you know SARS-CoV-2 will stay alive for four hours in copper?                                                           | 306 (43.7%) |
| K9   | Do you know SARS-CoV-2 will stay alive for three hours in aerosols?                                                        | 352 (50.2%) |
| K10  | Do you know that the SARS-CoV-2 virus on the surface of mobile phones mostly comes into contact with the nose and ear?     | 355 (51.2%) |
| K11  | Do you know about the new variants of SARS-CoV-2?                                                                          | 421 (60.5%) |
| K12  | Do you have proper knowledge regarding several chronic diseases that increase the death rate of COVID-19 infected persons? | 283 (40.7%) |

190

191

## 192 **3.2 Attitude**

193 Regarding attitude, a significant proportion of respondents (n = 473, 67.4%) strongly agreed and (n = 199,  
 194 28.8%) agreed that keeping themselves safe was breaking the chain of transmission of COVID-19 and (n =

195 424, 61.2%) strongly agreed and (n = 214, 30.9%) agreed that exercise and diet would increase the  
 196 immunity. Similarly, (n = 293, 41.7%) respondents strongly agreed and (n = 320, 45.6%) agreed that  
 197 preventive measures would reduce the risk of transmission; (n = 338, 48.1%) strongly agreed and (n = 296,  
 198 42.2%) agreed that staying in quarantine would reduce the transmission and (n = 272, 39.1%) strongly  
 199 agreed and (n = 353, 50.7%) agreed that pandemic could further lead to the difficult situation if not taken  
 200 care. However, a very small proportion of respondents (n = 99, 14.3%) strongly agreed and (n = 215, 31.1%)  
 201 agreed that they would soon get rid of the COVID-19 pandemic (Table 2).

202 **Table 2. An attitude of respondents on COVID-19**

| S.N | Items                                                                                      | Strongly agree | Agree       | Neutral     | Disagree  | Strongly disagree |
|-----|--------------------------------------------------------------------------------------------|----------------|-------------|-------------|-----------|-------------------|
| A1  | Do you think preventive measures will reduce the risk of transmission?                     | 293 (41.7%)    | 320 (45.6%) | 82 (11.7%)  | 3 (0.4%)  | 4 (0.6%)          |
| A2  | Do you think staying in quarantine will reduce the transmission?                           | 338 (48.1%)    | 296 (42.2%) | 63 (9%)     | 4 (0.6%)  | 1 (0.1%)          |
| A3  | Do you agree that keeping yourself safe is breaking the chain of transmission of COVID-19? | 473 (67.4%)    | 199 (28.8%) | 24 (3.4%)   | 4 (0.6%)  | 2 (0.3%)          |
| A4  | Do you believe that exercise and diet will increase immunity?                              | 424 (61.2%)    | 214 (30.9%) | 41 (5.9%)   | 5 (0.7%)  | 9 (1.3%)          |
| A5  | Do you believe that it can further lead to a difficult situation if not taken care of?     | 272 (39.1%)    | 353 (50.7%) | 59 (8.5%)   | 9 (1.3%)  | 3 (0.4%)          |
| A6  | Do you believe we will soon get rid of the COVID-19 pandemic?                              | 99 (14.3%)     | 215 (31.1%) | 282 (40.8%) | 56 (8.1%) | 39 (5.6%)         |

203

204

### 205 3.3 Practice

206 During the lockdown, a higher proportion of respondents (n = 601, 86.1%) always used a mask while going  
 207 outside followed by those who always covered their mouth and nose while coughing and sneezing (n = 576,  
 208 82.5%) and always washed their hands with soap for 20 sec or use alcohol-based sanitizer (n = 522, 74.6%).  
 209 Nevertheless, very few respondents did regular exercise (n = 222, 31.7%) and cleaned mobile phones with  
 210 sanitizer after coming from outside (n = 225, 32.2%) (Table 3).

211 **Table 3. The practice of prevention among respondents during lockdown**

| S.N. | Items                                                             | Always      | Most of the time | Sometime    | Rarely    | Never       |
|------|-------------------------------------------------------------------|-------------|------------------|-------------|-----------|-------------|
| PL1  | Washing hands with soap for 20 sec or use alcohol-based sanitizer | 522 (74.6%) | 139 (19.9%)      | 26 (3.7%)   | 8 (1.1%)  | 5 (0.7%)    |
| PL2  | Cover mouth and nose while coughing and sneezing.                 | 576 (82.5%) | 98 (14%)         | 15 (2.1%)   | 5 (0.7%)  | 4 (0.6%)    |
| PL3  | Maintain social distance up to 6ft                                | 469 (67%)   | 177 (25.3%)      | 37 (5.3%)   | 12 (1.7%) | 5 (0.7%)    |
| PL4  | Use a mask while going outside                                    | 601 (86.1%) | 72 (10.3%)       | 15 (2.1%)   | 6 (0.9%)  | 4 (0.6%)    |
| PL5  | Avoid crowd                                                       | 466 (66.7%) | 183 (26.2%)      | 25 (3.6%)   | 19 (2.7%) | 6 (0.9%)    |
| PL6  | Stay at home for safety                                           | 502 (71.7%) | 149 (21.3%)      | 20 (2.9%)   | 22 (3.1%) | 7 (1%)      |
| PL7  | Clean mobile phone with sanitizer after coming from outside       | 225 (32.2%) | 108 (15.5%)      | 103 (14.7%) | 69 (9.9%) | 194 (27.8%) |
| PL8  | Having proper diet                                                | 433 (61.9%) | 199 (28.5%)      | 32 (4.6%)   | 24 (3.4%) | 11 (1.6%)   |
| PL9  | Doing regular exercise                                            | 222 (31.7%) | 160 (22.9%)      | 164 (23.4%) | 31 (4.4%) | 123 (17.6%) |

212  
 213 After lockdown, (n = 439, 63.6%) always covered the mouth and nose while coughing and sneezing.  
 214 However, very few of them always stayed at home for safety (n = 53, 7.6%), cleaned mobile phones with  
 215 sanitizer after coming from outside (n = 57, 8.2%), and avoided crowds (n = 58, 8.4%) (Table 4). The  
 216 median score for practice for prevention during lockdown was 40 and after the lockdown was 33. The  
 217 Wilcoxon Rank Test showed that the relationship was statistically significant (p<0.001).

218 **Table 4. The practice for prevention among respondents after lockdown**

| S.N  | Items                                                             | Always      | Most of the time | Sometime    | Rarely      | Never       |
|------|-------------------------------------------------------------------|-------------|------------------|-------------|-------------|-------------|
| PC 1 | Washing hands with soap for 20 sec or use alcohol-based sanitizer | 294 (42.5%) | 239 (34.6%)      | 105 (15.2%) | 35 (5.1)    | 18 (2.6%)   |
| PC 2 | Cover mouth and nose while coughing and sneezing.                 | 439 (63.6%) | 169 (24.5%)      | 58 (8.4%)   | 13 (1.9%)   | 11(1.6%)    |
| PC 3 | Maintain social distance up to 6ft                                | 95 (13.7%)  | 226 (32.7%)      | 241 (34.9%) | 89 (12.9%)  | 40 (5.8%)   |
| PC 4 | Use a mask while going outside                                    | 419 (60.5%) | 168 (24.3%)      | 61 (8.8%)   | 28 (4%)     | 16 (2.3%)   |
| PC 5 | Avoid crowd                                                       | 58 (8.4%)   | 250 (36.3%)      | 264 (38.4%) | 97 (14.1%)  | 19 (2.8%)   |
| PC 6 | Stay at home for safety                                           | 53 (7.6%)   | 216 (31.2%)      | 247 (35.6%) | 139 (20.1%) | 38 (5.5%)   |
| PC 7 | Clean mobile phone with sanitizer after coming from outside       | 57 (8.2%)   | 70 (10.1%)       | 150 (21.7%) | 112 (16.2%) | 302 (43.7%) |
| PC 8 | Having proper diet                                                | 321(46.3%)  | 232 (46.3%)      | 92 (13.3%)  | 32 (4.6%)   | 16 (2.3%)   |
| PC 9 | Doing regular exercise                                            | 138 (19.9%) | 135 (19.5%)      | 194 (28%)   | 69 (10%)    | 157 (22.7%) |

219

### 220 **3.4 Relationship of KAP and socio-demographic characteristics**

221 Cronbach's alpha ( $\alpha$ ) value of the questionnaire for measuring knowledge level and attitude on COVID-19  
 222 was 0.8 and 0.6. Similarly,  $\alpha$  value of questionnaire practice for prevention on COVID-19 during and after  
 223 the lockdown was 0.8. The good knowledge on COVID -19 was significantly higher among the residents  
 224 of urban areas (n = 288, 48.5%) (p<0.001), unmarried (n = 113, 52.8%) (p<0.05), following white-collar  
 225 occupation 205 (51.8%) (p<0.001), educational level with graduate and above 49 (75.4%) (p<0.001) and  
 226 high-income level 252 (58.3%) (p<0.001).

227 A good attitude was significantly higher among the unmarried respondents (n = 86, 40.8%) (p<0.01), those  
228 following the white-collar occupation (n = 160, 39.4%) (p<0.001), and high-income group (n = 166, 37.4%)  
229 (p<0.001). In the same way, good practice for prevention on COVID -19 was significantly higher among  
230 the respondents from urban areas (n = 288, 46.7%) (p<0.01), unmarried group (n = 109, 51.2%) (p<0.05),  
231 following white-collar occupation (n = 220, 54.1%) (p<0.001), high-educated group (n = 42, 60.9%)  
232 (p<0.001) and having high-income (n = 245, 55.2%) (p<0.001 (Table 5).

233 Table 5. Socio-demographic characteristics of the population with different levels of KAP on COVID-19

| Variables              | Knowledge             |                    | Chi-square test (p-value) | Attitude              |                   | Chi-square test (p-value) | Practice              |                   | Chi-square test (p-value) |
|------------------------|-----------------------|--------------------|---------------------------|-----------------------|-------------------|---------------------------|-----------------------|-------------------|---------------------------|
|                        | Number of respondents | Good Knowledge (%) |                           | Number of respondents | Good Attitude (%) |                           | Number of respondents | Good Practice (%) |                           |
| <b>Municipality</b>    |                       |                    |                           |                       |                   |                           |                       |                   |                           |
| Rural                  | 62                    | 15 (24.2%)         |                           | 65                    | 14 (22.6%)        | 0.07                      | 60                    | 16 (26.7%)        | .003                      |
| Urban                  | 594                   | 288 (48.5%)        | <0.001                    | 631                   | 207 (33.7%)       |                           | 617                   | 288 (46.7%)       |                           |
| <b>Gender</b>          |                       |                    |                           |                       |                   |                           |                       |                   |                           |
| Male                   | 312                   | 150 (48.9%)        | 0.45                      | 318                   | 93 (29.2%)        | 0.09                      | 326                   | 138 (42.3%)       | 0.14                      |
| Female                 | 350                   | 158 (45.1%)        |                           | 364                   | 128 (35.2%)       |                           | 357                   | 171 (47.9%)       |                           |
| <b>Marital status</b>  |                       |                    |                           |                       |                   |                           |                       |                   |                           |
| Married                | 446                   | 193 (43.3%)        | 0.02                      | 469                   | 135 (28.8%)       | 0.002                     | 468                   | 199 (42.5%)       | 0.03                      |
| Unmarried              | 214                   | 113 (52.8%)        |                           | 211                   | 86 (40.8%)        |                           | 213                   | 109 (51.2%)       |                           |
| <b>Main occupation</b> |                       |                    |                           |                       |                   |                           |                       |                   |                           |
| Blue-collar            | 115                   | 30 (26.1%)         | <0.001                    | 120                   | 17 (14.2%)        | <0.001                    | 118                   | 28 (23.7%)        | <0.001                    |
| White-collar           | 396                   | 205 (51.8%)        |                           | 406                   | 160 (39.4%)       |                           | 407                   | 220 (54.1%)       |                           |
| Others                 | 118                   | 58 (49.2%)         |                           | 123                   | 36 (29.3%)        |                           | 123                   | 46 (37.4%)        |                           |
| <b>Age (years)</b>     |                       |                    |                           |                       |                   |                           |                       |                   |                           |
| <20                    | 32                    | 9 (28.1%)          | 0.02                      | 29                    | 9 (31%)           | 0.007                     | 33                    | 15 (45.5%)        | 0.41                      |
| 20-30                  | 256                   | 134 (52.3%)        |                           | 256                   | 98 (38.3%)        |                           | 251                   | 117 (46.6%)       |                           |

|                                     |     |             |        |     |             |        |     |             |        |
|-------------------------------------|-----|-------------|--------|-----|-------------|--------|-----|-------------|--------|
| 31-40                               | 153 | 71 (46.4%)  |        | 156 | 57 (36.5%)  |        | 157 | 63 (40.1%)  |        |
| 41-50                               | 120 | 55 (45.8%)  |        | 132 | 33 (25%)    |        | 134 | 68 (50.7%)  |        |
| >50                                 | 99  | 37 (37.4%)  |        | 106 | 23 (21.7%)  |        | 105 | 44 (41.9%)  |        |
| <b>Education of respondent</b>      |     |             |        |     |             |        |     |             |        |
| No Education                        | 49  | 7 (14.3%)   |        | 51  | 11 (21.6%)  | 0.09   | 54  | 8 (14.8%)   | <0.001 |
| Literate                            | 19  | 3(15.8%)    | <0.001 | 23  | 6 (26.1%)   |        | 22  | 8 (36.4%)   |        |
| Basic Education                     | 83  | 19 (22.9%)  |        | 87  | 20 (23%)    |        | 87  | 24 (27.6%)  |        |
| Secondary Education                 | 220 | 93 (42.3%)  |        | 225 | 74 (32.8%)  |        | 221 | 94 (42.5%)  |        |
| Undergraduate                       | 224 | 135 (60.3%) |        | 225 | 84 (37.3%)  |        | 227 | 130 (57.3%) |        |
| Graduate and above                  | 65  | 49 (75.4%)  |        | 68  | 24 (35.3%)  |        | 69  | 42 (60.9%)  |        |
| <b>Income- Nepalese Rupee (NPR)</b> |     |             |        |     |             |        |     |             |        |
| <5000                               | 25  | 6 (24%)     | <0.001 | 28  | 3 (10.7%)   | <0.001 | 27  | 5 (18.5%)   | <0.001 |
| 5000-10,000                         | 48  | 8 (16.7%)   |        | 47  | 7 (14.9%)   |        | 48  | 10 (20.8%)  |        |
| 10,000-15,000                       | 54  | 9 (16.7%)   |        | 60  | 11 (18.3%)  |        | 59  | 11 (18.6%)  |        |
| 15,000-20,000                       | 100 | 32 (32%)    |        | 100 | 34 (34%)    |        | 102 | 38 (37.3%)  |        |
| >20,000                             | 432 | 252 (58.3%) |        | 444 | 166 (37.4%) |        | 444 | 245 (55.2%) |        |

235 Logistic regression analysis showed that the respondents in urban areas were 2.34 times more likely to have  
236 knowledge (95% CI 1.19 to 5.39) than those staying in rural areas. Similarly, those with white-collar (OR:  
237 1.24; 95% CI 0.70 to 2.19) and other occupations (OR 1.68, 95% CI 0.88 to 3.19) had higher odds of having  
238 knowledge compared to blue-collar occupations. Highly educated respondents such as graduate and above  
239 (OR: 11.54; CI 3.58 to 38.10), undergraduate (OR: 6.90; CI 2.44 to 37.23), having secondary education  
240 (OR: 4.54; 95% CI 1.66 to 12.34) had higher odds of having knowledge than the non-educated group.  
241 Likewise, the odds ratio of having good knowledge on prevention among the higher income group with  
242 monthly income >NRs 20,000 was 2.57 (95% CI 0.84 to 7.90).

243 Regarding attitude, people with white-collar occupations (OR: 3.08, 95% CI 1.67 to 5.68) and other  
244 occupations (OR: 1.98, 95% CI 0.77 to 5.04) had high odds of having a good attitude compared to those  
245 having blue-collar occupation.

246 In the same way, urban people were 1.99 times more likely to adopt the good practice for prevention (95%  
247 CI 1.04 to 3.79) compared to rural people. Also, females were 1.70 times more likely to have good  
248 preventive practice (95% CI 1.19 to 2.43) than males. Our study further revealed that the odds ratio of  
249 practicing good preventive behavior was 1.79 times (95% CI 1.04 to 3.08) for those with white-collar  
250 occupations. Moreover, educated respondents such as graduate and above (OR: 7.82, 95% CI 2.66 to 22.93),  
251 undergraduate (OR: 7.53, 95% CI 2.84 to 20.01), secondary education (OR: 5.52, 95% CI 2.15 to 14.12)  
252 and basic education (OR: 3.06, 95% CI 1.13 to 8.29) had higher odds of practicing good preventive behavior  
253 compared to non-educated group (Table 6).



254 **Table 6. Odds ratios of having good knowledge, attitude, practice on COVID-19 among the general population according to the socio-**  
 255 **demographic characteristics**

| Variables              | Good knowledge         |                        | Good attitude          |                        | Good practice          |                       |
|------------------------|------------------------|------------------------|------------------------|------------------------|------------------------|-----------------------|
|                        | Univariate             | Multivariate           | Univariate             | Multivariate           | Univariate             | Multivariate          |
| <b>Municipality</b>    |                        |                        |                        |                        |                        |                       |
| Rural                  | 1                      | 1                      | 1                      | 1                      | 1                      | 1                     |
| Urban                  | 2.94 (1.61 to 5.39)*** | 2.34 (1.19 to 4.57)*   | 1.73 (0.93 to 3.22)    | 1.72 (0.87 to 3.40)    | 2.40 (1.33 to 4.35)**  | 1.99 (1.04 to 3.79)*  |
| <b>Gender</b>          |                        |                        |                        |                        |                        |                       |
| Male                   | 1                      | 1                      | 1                      | 1                      | 1                      | 1                     |
| Female                 | 0.88 (0.65 to 1.20)    | 0.96 (0.67 to 1.41)    | 1.32 (0.94 to 1.81)    | 1.32 (0.90 to 1.90)    | 1.25 (0.92 to 1.69)**  | 1.70 (1.19 to 2.43)** |
| <b>Marital status</b>  |                        |                        |                        |                        |                        |                       |
| Unmarried              | 1                      | 1                      | 1                      | 1                      | 1                      | 1                     |
| Married                | 0.68 (0.49 to 0.94)*   | 0.89 (0.52 to 1.52)    | 0.58 (0.41 to 0.82)**  | 0.63 (0.37 to 1.04)    | 0.70 (0.51 to 0.97)*   | 0.61 (0.35 to 1.08)   |
| <b>Main occupation</b> |                        |                        |                        |                        |                        |                       |
| Blue-collar            | 1                      | 1                      | 1                      | 1                      | 1                      | 1                     |
| White-collar           | 3.04 (1.91 to 4.82)*** | 1.24 (0.70 to 2.19)*** | 3.94 (2.27 to 6.83)*** | 3.08 (1.67 to 5.68)*** | 3.78 (2.37 to 6.03)*** | 1.79 (1.04 to 3.08)*  |
| Others                 | 2.73 (1.57 to 4.75)*** | 1.68 (0.88 to 3.19)**  | 2.50 (1.31 to 4.77)**  | 1.98 (0.77 to 5.04)*   | 1.92 (1.09 to 3.36)*   | 1.13 (0.60 to 2.12)   |
| <b>Age (years)</b>     |                        |                        |                        |                        |                        |                       |

|                                     |                          |                          |                     |                     |                         |                         |
|-------------------------------------|--------------------------|--------------------------|---------------------|---------------------|-------------------------|-------------------------|
| <20                                 | 1                        | 1                        |                     | 1                   | 1                       | 1                       |
| 20-30                               | 2.80 (1.25 to 6.30)*     | 3.46 (1.32 to 9.03)**    | 1.37 (0.60 to 3.14) | 1.98 (0.77 to 5.04) | 1.04 (0.50 to 2.17)     | 1.18 (0.50 to 2.78)     |
| 31-40                               | 2.21 (0.96 to 5.03)      | 3.89 (1.30 to 11.63)*    | 1.27 (0.54 to 2.99) | 2.36 (0.81 to 6.84) | 0.80 (0.37 to 1.71)     | 1.48 (0.54 to 4.01)     |
| 41-50                               | 2.16 (0.92 to 5.06)      | 4.06 (1.29 to 12.74)*    | 0.74 (0.30 to 1.78) | 1.36 (0.44 to 4.17) | 1.23 (0.57 to 2.65)     | 2.66 (0.93 to 7.56)     |
| >50                                 | 1.52 (0.63 to 3.64)      | 4.81 (1.47 to 15.68)**   | 0.61 (0.24 to 1.53) | 1.13 (0.35 to 3.64) | 0.86 (0.39 to 1.90)     | 2.71 (0.91 to 8.03)     |
| <b>Education of respondent</b>      |                          |                          |                     |                     |                         |                         |
| No Education                        | 1                        | 1                        | 1                   | 1                   | 1                       | 1                       |
| Literate                            | 1.12 (0.25 to 4.89)      | 0.90 (0.18 to 4.40)      | 1.28 (0.40 to 4.03) | 0.86 (0.23 to 3.20) | 3.28 (1.04 to 10.35)*   | 3.33 (0.92 to 12.01)    |
| Basic Education                     | 1.78 (0.68 to 4.60)      | 1.87 (0.63 to 5.49)      | 1.08 (0.47 to 2.49) | 0.84 (0.31 to 2.16) | 2.19 (0.90 to 5.31)     | 3.06 (1.13 to 8.29)*    |
| Secondary Education                 | 4.39 (1.89 to 10.21)**   | 4.54 (1.66 to 12.34)**   | 1.78 (0.86 to 3.67) | 1.04 (0.44 to 2.46) | 4.25 (1.91 to 9.44)***  | 5.52 (2.15 to 14.12)*** |
| Undergraduate                       | 9.10 (3.91 to 21.16)***  | 6.90 (2.44 to 37.23)***  | 2.16 (1.05 to 4.45) | 0.76 (0.30 to 1.89) | 7.70 (3.47 to 17.04)*** | 7.53 (2.84 to 20.01)*** |
| Graduate and above                  | 18.37 (6.90 to 48.91)*** | 11.54 (3.58 to 38.10)*** | 1.98 (0.86 to 4.55) | 0.56 (0.20 to 1.58) | 8.94 (3.66 to 21.84)*** | 7.82 (2.66 to 22.93)*** |
| <b>Income-Nepalese Rupees (NPR)</b> |                          |                          |                     |                     |                         |                         |
| <5000                               | 1                        | 1                        | 1                   | 1                   | 1                       | 1                       |

|               |                        |                      |                       |                       |                         |                     |
|---------------|------------------------|----------------------|-----------------------|-----------------------|-------------------------|---------------------|
| 5000-10,000   | 0.63 (0.19 to 2.08)    | 0.93 (0.24 to 3.55)  | 1.45 (0.34 to 6.16)   | 2.03 (0.37 to 11.06)  | 1.15 (0.35 to 3.82)     | 1.29 (0.33 to 5.02) |
| 10,000-15,000 | 0.63 (0.19 to 2.02)    | 0.55 (0.14 to 2.14)  | 1.87 (0.47 to 7.32)   | 2.04 (0.40 to 10.39)  | 1.008 (0.31 to 3.25)    | 0.94 (0.25 to 3.50) |
| 15,000-20,000 | 1.49 (0.54 to 4.08)    | 1.41 (0.43 to 4.57)  | 4.29 (1.20 to 15.24)* | 4.76 (1.01 to 22.38)* | 2.61 (0.91 to 7.47)     | 2.19 (0.65 to 7.35) |
| >20,000       | 4.43 (1.73 to 11.32)** | 2.57 (0.84 to 7.90)* | 4.97 (1.48 to 16.73)* | 4.29 (0.94 to 19.54)  | 5.47 (2.01 to 14.56)*** | 2.62 (0.82 to 8.35) |

256

257

## 258 **4. Discussion**

259 Our study aimed to understand the knowledge, attitude, and practice (KAP on COVID-19 pandemic and its  
260 relationship with socio-demographic characteristics among the general population in Nepal.

261 The higher proportion of respondents had good knowledge of symptoms such as fever, dry cough, tiredness,  
262 aches and pains, sore throat, loss of taste or smell, difficulty breathing or shortness of breath and very few  
263 had knowledge of symptoms such as diarrhea, conjunctivitis, rash on the skin, or discoloration of fingers  
264 or toes and loss of speech or movement. The knowledge of the overall symptoms of COVID-19 among the  
265 community was observed to be very low although the understanding is very essential during the pandemic.  
266 Other similar studies also revealed that a higher proportion of community people had knowledge of  
267 symptoms such as fever and cough and very less knew about the other symptoms of COVID-19 compared  
268 to our study (31, 33). A lower level of knowledge on overall symptoms might prevent the early detection  
269 of disease and hinder the timely treatment (15).

270 Our study illustrated that knowledge on preventive behaviors seemed to be high which is in line with similar  
271 study conducted in Bangladesh (33). However, the knowledge of survival period of SARS-CoV-2 in an  
272 external environment was low, which might increase the risk of disease transmission. Similarly, the low  
273 knowledge associated with comorbidities such as diabetes, Chronic obstructive Pulmonary Disease ,  
274 hypertension, malignancy, etc. among the study population can further augment the severity of COVID-19  
275 patients leading to hospitalization, admission to intensive care unit, and increase in the mortality rate (42).

276 Our study further showed that the majority of people had a positive attitude such that most of them agree  
277 that preventive measures will reduce the risk of transmission, pre-conditions required to stay in quarantine,  
278 keeping themselves safe, proper diet and exercise, and taking necessary steps to reduce possible difficulties.  
279 However, they were not convinced that they would get rid of the pandemic soon. After the lockdown, the  
280 preventive practice is observed to be lowered compared to the practice during the lockdown. The reduction

281 in the mortality rate does not mean that the pandemic will end soon. There is always the risk of the  
282 emergence of new VOCs that might be responsible for new waves of the COVID-19 pandemic. The  
283 negligence of community people was observed though they had knowledge and information. The result was  
284 in line with the study conducted in Janakpur, Nepal which revealed that though the perception on COVID-  
285 19 was not so different, the preventive behaviors were reduced in post-lockdown compared to the behaviors  
286 during the lockdown. The less precautionary behavior was especially observed among those following  
287 unofficial sources of information after lockdown compared to those following official government sites  
288 (43). During a humanitarian crisis, such as a pandemic, the spread of rumors, and misleading information  
289 through social media and various other communication mediums especially unofficial sources can further  
290 impact the KAP level of community people which led to an increase in morbidity and mortality (44). Such  
291 misinformation might affect the psychology and behavioral patterns of people hindering even simple  
292 practices such as hand washing, and social distancing (45). Therefore, it is important to trace the source of  
293 misinformation and make people aware of its impact (46).

294 The regular monitoring and study regarding KAP on COVID-19 during the pandemic should be prioritized  
295 by concerned authorities.

296 Our study uncovered that the KAP on COVID-19 among the general population were influenced by socio-  
297 demographic characteristics. The population living in the urban area had good knowledge on COVID-19  
298 and good practice in prevention compared to those living in rural areas. The findings were similar to the  
299 study conducted in Bangladesh (33, 34). The reason behind this could be that the people living in rural areas  
300 do not have easy access to information sources. In contrast, urban people have easy access to various types  
301 of information sources that increase their familiarity on COVID-19 (47). Besides, the protection facilities  
302 are easily available in these areas to adopt preventive measures.

303 The respondents with white-collar occupations had good KAP. The result was in line with the study  
304 conducted in Ethiopia which showed that the people working as a government officers and merchant were  
305 more likely to have sufficient knowledge on COVID-19 than those working as a laborer (47). Similar

306 studies conducted in Turkey (35) and China (36) also illustrated the higher knowledge level on COVID-19  
307 among the white-collar workers. The respondents having white-collar occupations mostly have easy access  
308 to information and strong learning ability further aids in increasing their attitude and practice. Our study  
309 further revealed that the highly educated respondents had good KAP on COVID-19; and this bear a  
310 resemblance to the study conducted in North East Ethiopia (32) and Bangladesh (33, 34). Highly educated  
311 people are more sensitive and have a better understanding of pertinent issues in society. Accordingly, they  
312 perceive the impact of pandemics more seriously, improving their attitude and practice for prevention along  
313 with the knowledge received (37).

314 Similarly, high-income respondents were observed to have good KAP in our study recapitulating the studies  
315 conducted in Malaysia (38) and Bangladesh (34). High-income people are mostly educated and low-income  
316 people are least educated with lower understanding. Furthermore, females were more likely to practice  
317 preventive behavior compared to males. The finding was similar to the studies conducted in Iran (39) and  
318 Bangladesh (33, 34). This result can be supported by the fact that women are more concerned about their  
319 health because they are socialized to be more serious and responsible about themselves and their family  
320 members' health issues (40, 48, 49).

321 Knowledge itself is the foundation of learning, and the basis of establishing attitude, and attitude further  
322 influence the practice of people (36). Our study showed that the KAP were different according to the  
323 varying socio-demographic conditions. Moreover, the differences in learning abilities according to the  
324 diverse socio-demographic characteristics among the Nepalese population were highlighted in previous  
325 literatures (50, 51).. The pace of obtaining knowledge, and developing the attitude and practice of an  
326 individual depends upon their intellectual ability and previous knowledge (52). To reduce this gap among  
327 people of different socio-demographic statuses and to make communication more effective, it is important  
328 to identify the differences between messages disseminated and received as a result of differential exposure  
329 to the intervention, inconsistencies in interpretation, and transforming information (53). It is important to

330 consider the channel through which the message is disseminated, to whom the message is attributed, the  
331 response of the audience, and the feature of the message.

332 Ministry of Health and Population, Nepal Government has prepared, ‘Guideline for Mobilization of  
333 COVID-19 Facilitation Group in Community Level’ (54), ‘Public Health Standards Regarding COVID-  
334 19 during Festivals and Celebrations’ (55), ‘COVID-19 Micro Contaminant Plan’ (56), and  
335 ‘Environmental Cleaning and Disinfection Interim Guidance in the context of COVID-19’ (57), which  
336 highlighted the prevention measures in households to community level and also the regular monitoring of  
337 preventive behavior among the community people.

338 The key messages highlighted in these documents should be translated to different languages and also in  
339 understandable form by the entire population including poor and marginalized people. Besides, the  
340 information disseminated should be based on scientific evidence to convince the people. Although the  
341 ‘Guideline on the Distribution of Isolation Kits for Home Isolation Cases’ (58) was prepared by Nepal  
342 Government, the distribution of kit consisting materials for preventive measures should also be  
343 emphasized especially among the most needful people such as those with a low-economic conditions or  
344 rural people who have poor behavioral practices in prevention.

345 A targeted program is necessary to improve the KAP on COVID-19 according to gender, occupation,  
346 income, educational background, and area of residence that will aid to control the risk of further waves of  
347 the pandemic in the future. Moreover, the use of social norms theory should be emphasized to accomplish  
348 positive health outcomes. Therefore, it is important to understand the approach to integrating social norms  
349 for better communication and improving the knowledge, attitude, and practice on COVID-19 (59, 60). The  
350 needful and effective steps by concerned stakeholders from diverse disciplines will help to aware the  
351 community and augment preventive behavior.

352

353

## 354 **5. Conclusions**

355 Findings from our study are imperative to understand the perceived knowledge, attitude and behavior during  
356 the COVID-19 pandemic according to the various socio-demographic characteristics. The knowledge level  
357 among the general population was good regarding symptoms, preventive practices, and pre-conditions to  
358 stay in quarantine. However, only a few of them knew about the survival duration of SARS-CoV-2 in  
359 fomites such as stainless steel, plastic, cardboard, copper, and aerosols. Regarding attitude, few people  
360 believed that they would soon get rid of the pandemic. Concerning practice for prevention, few people  
361 practiced staying at home safely, avoiding crowds, and cleaning mobile phones after coming from outside,  
362 while many of them frequently washed their hands with soap or used sanitizer, covered their mouth or nose  
363 while sneezing or coughing, used masks and took proper diet. The overall practice of prevention was  
364 reduced after the lockdown compared to the practice during the lockdown.

365 The people residing in urban areas, with white-collar occupations, high-income, and high-education were  
366 good at KAP on COVID-19. In addition, females seem to be good at practicing preventive behavior  
367 although their knowledge level was lower compared to male.

368 The KAP on COVID-19 were found to be different among the people with varying socio-economic  
369 conditions due to the difference in the level of their understanding and available resources. The study result  
370 recommends the subsequent improvement in existing plans, policies, and guidelines for their effective  
371 implementation considering effectual dissemination of information as well as infodemic management. The  
372 multifaceted approach along with the significant contribution of concerned stakeholders is essential to deal  
373 with the challenges during such a health crisis with effective utilization of the available limited resources.

374

375

376



## 377 **Acknowledgments**

378 The authors would like to thank all the volunteers associated with Nepal Red Cross Society (NRCS) district  
379 chapters for their contribution in questionnaire survey and valuable suggestions during the survey; and all  
380 the respondents of the survey.

381

## 382 **Authors' contribution**

383 Conceptualization: Salina Shrestha, Rabin Malla, Sadhana Shrestha, Pallavi Singh, Jeevan B. Sherchand

384 Data Curation: Salina Shrestha

385 Formal analysis: Salina Shrestha

386 Funding Acquisition: Rabin Malla

387 Investigation: Rabin Malla, Salina Shrestha, Pallavi Singh

388 Methodology: Salina Shrestha, Rabin Malla, Sadhana Shrestha, Pallavi Singh

389 Project Administration: Rabin Malla, Pallavi Singh, Salina Shrestha

390 Supervision: Jeevan B. Sherchand, Rabin Malla, Sadhana Shrestha, Pallavi Singh

391 Writing Original draft and preparation: Salina Shrestha, Rabin Malla

392 Writing-Review & Editing: Sadhana Shrestha, Jeevan B. Sherchand, Rabin Malla

393

## 394 **Data Availability Statement**

395 Data will be available on request.

## 396 **References**

- 397 1. World Health Organization. Naming the coronavirus disease (COVID-19) and the virus that causes  
398 it. Available from: [https://www.who.int/emergencies/diseases/novel-coronavirus-2019/technical-](https://www.who.int/emergencies/diseases/novel-coronavirus-2019/technical-guidance/naming-the-coronavirus-disease-(covid-2019)-and-the-virus-that-causes-it)  
399 [guidance/naming-the-coronavirus-disease-\(covid-2019\)-and-the-virus-that-causes-it](https://www.who.int/emergencies/diseases/novel-coronavirus-2019/technical-guidance/naming-the-coronavirus-disease-(covid-2019)-and-the-virus-that-causes-it).
- 400 2. World Health Organization. WHO Director-General’s opening remarks at the media briefing on  
401 COVID-19-11 March 2020. Available from: [https://www.who.int/director-](https://www.who.int/director-general/speeches/detail/who-director-general-s-opening-remarks-at-the-media-briefing-on-covid-19---11-march-2020)  
402 [general/speeches/detail/who-director-general-s-opening-remarks-at-the-media-briefing-on-covid-](https://www.who.int/director-general/speeches/detail/who-director-general-s-opening-remarks-at-the-media-briefing-on-covid-19---11-march-2020)  
403 [19---11-march-2020](https://www.who.int/director-general/speeches/detail/who-director-general-s-opening-remarks-at-the-media-briefing-on-covid-19---11-march-2020)
- 404 3. Bastola A, Sah R, Rodriguez-Morales, AJ, Lal BK, Jha R, Ojha HC, Shrestha B, Chu D, Poon L,  
405 Costello A, Morita K, Pandey BD. The first 2019 novel coronavirus case in Nepal. *The Lancet.*  
406 *Infectious diseases.* 2020; 20(3), 279–280. 2020. [https://doi.org/10.1016/S1473-3099\(20\)30067-0](https://doi.org/10.1016/S1473-3099(20)30067-0)
- 407 4. Chirwa GC. Who knows more, and why? Explaining socioeconomic-related inequality in  
408 knowledge about HIV in Malawi. *Scientific African.* 2020;7:e00213.
- 409 5. Chirwa GC. Socio-economic inequality in comprehensive knowledge about HIV in Malawi.  
410 *Malawi Medical Journal.* 2019; 31(2):104-111.
- 411 6. World Health Organization. COVID-19 Advice for the Public: Getting Vaccinated. Available  
412 from: [https://www.who.int/emergencies/diseases/novel-coronavirus-2019/covid-19-](https://www.who.int/emergencies/diseases/novel-coronavirus-2019/covid-19-vaccines/advice)  
413 [vaccines/advice](https://www.who.int/emergencies/diseases/novel-coronavirus-2019/covid-19-vaccines/advice) .
- 414 7. Rubin GJ, Brainard J, Hunter P, Michie S. Are People Letting down Their Guard Too Soon after  
415 COVID-19 Vaccination? 2021. Available online: [https://blogs.bmj.com/bmj/2021/03/18/are-](https://blogs.bmj.com/bmj/2021/03/18/are-people-letting-down-their-guard-too-soon-after-covid-19-vaccination/?utm_source=twitter&utm_medium=social&utm_term=hootsuite&utm_content=sme&utm_campaign=usage)  
416 [people-letting-down-their-guard-too-soon-after-covid-19-](https://blogs.bmj.com/bmj/2021/03/18/are-people-letting-down-their-guard-too-soon-after-covid-19-vaccination/?utm_source=twitter&utm_medium=social&utm_term=hootsuite&utm_content=sme&utm_campaign=usage)  
417 [vaccination/?utm\\_source=twitter&utm\\_medium=social&utm\\_term=hootsuite&utm\\_content=sme](https://blogs.bmj.com/bmj/2021/03/18/are-people-letting-down-their-guard-too-soon-after-covid-19-vaccination/?utm_source=twitter&utm_medium=social&utm_term=hootsuite&utm_content=sme&utm_campaign=usage)  
418 [&utm\\_campaign=usage](https://blogs.bmj.com/bmj/2021/03/18/are-people-letting-down-their-guard-too-soon-after-covid-19-vaccination/?utm_source=twitter&utm_medium=social&utm_term=hootsuite&utm_content=sme&utm_campaign=usage).

- 419 8. Rayamajhee B, Pokhrel A, Syangtan G, Khadka S, Lama B, Rawal LB, Mehata S, Mishra SK,  
420 Pokhrel R, Yadav UN. How well the government of Nepal is responding to COVID-19? An  
421 experience from a resource-limited country to confront unprecedented pandemic. *Frontiers in*  
422 *public health*. 2021; 9:597808.
- 423 9. Ministry of Health and Population, Government of Nepal. Responding to COVID-19: Health  
424 sector preparedness, response and lessons learnt. 2021. Available from:  
425 [https://mohp.gov.np/attachments/article/703/Responding%20to%20COVID-](https://mohp.gov.np/attachments/article/703/Responding%20to%20COVID-19,%20Health%20sector%20preparedness,%20response%20and%20lessons%20learnt.pdf)  
426 [19,%20Health%20sector%20preparedness,%20response%20and%20lessons%20learnt.pdf](https://mohp.gov.np/attachments/article/703/Responding%20to%20COVID-19,%20Health%20sector%20preparedness,%20response%20and%20lessons%20learnt.pdf)
- 427 10. Himalayan Climate Initiative. COVID-19 and the new normal for women in the economy in Nepal.  
428 2021. Available from : [https://asiafoundation.org/wp-content/uploads/2021/03/Covid-19-The-](https://asiafoundation.org/wp-content/uploads/2021/03/Covid-19-The-New-Normal-for-Women-in-the-Economy-in-Nepal.pdf)  
429 [New-Normal-for-Women-in-the-Economy-in-Nepal.pdf](https://asiafoundation.org/wp-content/uploads/2021/03/Covid-19-The-New-Normal-for-Women-in-the-Economy-in-Nepal.pdf)
- 430 11. Ministry of Health and Population, Government of Nepal. Coronavirus disease (COVID-19)  
431 outbreak updates & resource materials. 2021. Available from: [https://heoc.mohp.gov.np/update-](https://heoc.mohp.gov.np/update-on-novel-corona-virus-covid-19/)  
432 [on-novel-corona-virus-covid-19/](https://heoc.mohp.gov.np/update-on-novel-corona-virus-covid-19/)
- 433 12. Guess AM, Lerner M, Lyons B, Montgomery JM, Nyhan B, Reifler J, Sircar N. A digital media  
434 literacy intervention increases discernment between mainstream and false news in the United  
435 States and India. *Proceedings of the National Academy of Sciences*. 2020; 117(27):15536-45.
- 436 13. Democracy Resource Center Nepal. The Federal, Provincial and local governments in COVID-19  
437 prevention, control and treatment. 2020. Available from:  
438 [https://www.democracyresource.org/wp-content/uploads/2020/10/COVID-19\\_Update-](https://www.democracyresource.org/wp-content/uploads/2020/10/COVID-19_Update-6_31October2020.pdf)  
439 [6\\_31October2020.pdf](https://www.democracyresource.org/wp-content/uploads/2020/10/COVID-19_Update-6_31October2020.pdf)
- 440 14. Das V Stigma, contagion, defect: Issues in the anthropology of public health. *Stigma and Global*  
441 *Health: Developing a Research Agenda*. 2001 5: 5-7. Available from:  
442 [https://www.semanticscholar.org/paper/Stigma-%2C-Contagion-%2C-Defect-%3A-Issues-in-](https://www.semanticscholar.org/paper/Stigma-%2C-Contagion-%2C-Defect-%3A-Issues-in-the-of-Das-Goffman/5113ba09191943a0234e59f5d5ef37b683d502a8)  
443 [the-of-Das-Goffman/5113ba09191943a0234e59f5d5ef37b683d502a8](https://www.semanticscholar.org/paper/Stigma-%2C-Contagion-%2C-Defect-%3A-Issues-in-the-of-Das-Goffman/5113ba09191943a0234e59f5d5ef37b683d502a8)

- 444 15. Person B, Sy F, Holton K, Govert B, Liang A, National Center for Infectious Diseases /SARS  
445 Community Outreach Team. Fear and stigma: the epidemic within the SARS outbreak. *Emerg*  
446 *Infect Dis.* 2004; 10 (2):358-63. <https://doi.org/10.3201/eid1002.030750>
- 447 16. United Nations Development Programme. Rapid assessment of socioeconomic impact of COVID-  
448 19 in Nepal. 2020.
- 449 17. Zervos FH. World Bank Nepal. Responding to gender-based violence in Maldives, Nepal, and Sri  
450 Lanka. 2020. Available from: [https://blogs.worldbank.org/endpovertyinsouthasia/responding-](https://blogs.worldbank.org/endpovertyinsouthasia/responding-gender-based-violence-maldives-nepal-and-sri-lanka)  
451 [gender-based-violence-maldives-nepal-and-sri-lanka](https://blogs.worldbank.org/endpovertyinsouthasia/responding-gender-based-violence-maldives-nepal-and-sri-lanka)
- 452 18. Dahal M, Khanal P, Maharjan S, Panthi B, Nepal S. Mitigating violence against women and young  
453 girls during COVID-19 induced lockdown in Nepal: a wake-up call. *Globalization and health.*  
454 2020; 16(1):1-3. <https://doi.org/10.1186/s12992-020-00616-w>
- 455 19. Lippi G, Henry BM, Sanchis-Gomar F. Physical inactivity and cardiovascular disease at the time  
456 of coronavirus disease 2019 (COVID-19). *Eur. J. Prev. Cardiol.* 2020; 27(9):906-908.  
457 <https://doi.org/10.1177/2047487320916823>
- 458 20. Poudel K, Subedi P. Impact of COVID-19 pandemic on socioeconomic and mental health aspects  
459 in Nepal. *Int. J. Soc. Psychiatry.* 2020; 66(8):748-55.
- 460 21. Ping W, Zheng J, Niu X, Guo C, Zhang J, Yang H, Shi Y. Evaluation of health-related quality of  
461 life using EQ-5D in China during the COVID-19 pandemic. *PLoS One.* 2020. 18; 15(6):e0234850.  
462 doi: 10.1371/journal.pone.0234850. PMID: 32555642; PMCID: PMC7302485.
- 463 22. Wang PW, Ko NY, Chang YP, Wu CF, Lu WH, Yen CF. Subjective deterioration of physical and  
464 psychological health during the COVID-19 pandemic in Taiwan: their association with the  
465 adoption of protective behaviors and mental health problems. *Int. J. Environ. Res. Public Health.*  
466 2020; 17(18):6827.
- 467 23. Otto SP, Day T, Arino J, Colijn C, Dushoff J, Li M, Mechai S, Van Domselaar G, Wu J, Earn DJ,  
468 Ogden NH. The origins and potential future of SARS-CoV-2 variants of concern in the evolving

- 469 COVID-19 pandemic. Current Biology. 2021; 31(14): R918-  
470 929.<https://doi.org/10.1016/j.cub.2021.06.049>
- 471 24. United Nations Children’s Fund. Health Budget: FY 2021/22. 2021. Available from:  
472 [https://www.unicef.org/nepal/media/14426/file/Budget%20Brief%20-%202021-22%20-](https://www.unicef.org/nepal/media/14426/file/Budget%20Brief%20-%202021-22%20-%20Health.pdf)  
473 [%20Health.pdf](https://www.unicef.org/nepal/media/14426/file/Budget%20Brief%20-%202021-22%20-%20Health.pdf)
- 474 25. Yale Economic Growth Center. COVID-19 and Nepal’s health financing. 2020. Available from:  
475 [https://www.google.com/url?sa=t&rct=j&q=&esrc=s&source=web&cd=&cad=rja&uact=8&ved=2ahUKEwjFkL2CzMr5AhXr-](https://www.google.com/url?sa=t&rct=j&q=&esrc=s&source=web&cd=&cad=rja&uact=8&ved=2ahUKEwjFkL2CzMr5AhXr-DgGHQH7C3wQFnoECAoQAQ&url=https%3A%2F%2Fwww.nasc.org.np%2Ffile%2F4777%2Fdownload%3Ftoken%3DpvTLA21v&usg=AOvVaw3nCF1-04icZDIPgrO4D79t)  
476 [DgGHQH7C3wQFnoECAoQAQ&url=https%3A%2F%2Fwww.nasc.org.np%2Ffile%2F4777%](https://www.google.com/url?sa=t&rct=j&q=&esrc=s&source=web&cd=&cad=rja&uact=8&ved=2ahUKEwjFkL2CzMr5AhXr-DgGHQH7C3wQFnoECAoQAQ&url=https%3A%2F%2Fwww.nasc.org.np%2Ffile%2F4777%2Fdownload%3Ftoken%3DpvTLA21v&usg=AOvVaw3nCF1-04icZDIPgrO4D79t)  
477 [2Fdownload%3Ftoken%3DpvTLA21v&usg=AOvVaw3nCF1-04icZDIPgrO4D79t](https://www.google.com/url?sa=t&rct=j&q=&esrc=s&source=web&cd=&cad=rja&uact=8&ved=2ahUKEwjFkL2CzMr5AhXr-DgGHQH7C3wQFnoECAoQAQ&url=https%3A%2F%2Fwww.nasc.org.np%2Ffile%2F4777%2Fdownload%3Ftoken%3DpvTLA21v&usg=AOvVaw3nCF1-04icZDIPgrO4D79t)
- 478
- 479 26. Shrestha PM. Budget heavily relies on foreign funds for Covid-19 prevention. The Kathmandu  
480 Post. 2021. Available from: [https://kathmandupost.com/national/2021/06/02/budget-heavily-](https://kathmandupost.com/national/2021/06/02/budget-heavily-relies-on-foreign-funds-for-covid-19-prevention)  
481 [relies-on-foreign-funds-for-covid-19-prevention](https://kathmandupost.com/national/2021/06/02/budget-heavily-relies-on-foreign-funds-for-covid-19-prevention)
- 482 27. Ghimire U, Shrestha N, Adhikari B, Mehata S, Pokharel Y, Mishra SR. Health system’s  
483 readiness to provide cardiovascular, diabetes and chronic respiratory disease related services in  
484 Nepal: analysis using 2015 health facility survey. BMC public health. 2020; 20(1):1-5.
- 485 28. Pokharel S, Raut S, Rijal KR, Adhikari B. Coronavirus disease 2019 pandemic–public health  
486 preparedness in Nepal and one health approach. Disaster Medicine and Public Health  
487 Preparedness. 2021; 15 (5):e1-2. <https://doi.org/10.1017/dmp.2020.172>
- 488 29. Shrestha N, Mishra SR, Ghimire S, Gyawali B, Marahatta SB, Maskey S, Baral S, Shrestha N,  
489 Yadav R, Pokharel S, Adhikari B. Health system preparedness for COVID-19 and its impacts on  
490 frontline health-care workers in Nepal: A qualitative study among frontline health-care workers  
491 and policy-makers. Disaster medicine and public health preparedness. 2021; 1-9.  
492 <https://doi.org/10.1017/dmp.2021.204>

- 493 30. Rosenstock IM. Why people use health services. *The Milbank Quarterly*. 2005; 83(4).  
494 <https://doi.org/10.1111/j.1468-0009.2005.00425.x>
- 495 31. Endriyas M, Kawza A, Alano A, Hussien M, Mekonnen E, Samuel T, Shiferaw M, Ayele S,  
496 Kelaye T, Misganaw T, Shibru E. Knowledge and attitude towards COVID-19 and its  
497 prevention in selected ten towns of SNNP Region, Ethiopia: Cross-sectional survey. *PLoS One*.  
498 2021; 16(8):e0255884. doi: 10.1371/journal.pone.0255884. PMID: 34358267; PMCID:  
499 PMC8345859.
- 500 32. Gebretsadik D, Gebremichael S, Belete MA. Knowledge, Attitude and Practice toward COVID-  
501 19 Pandemic among Population Visiting Dessie Health Center for COVID-19 Screening,  
502 Northeast Ethiopia. *Infect Drug Resist*. 2021;14: 905-915. doi: 10.2147/IDR.S297047. PMID:  
503 33716509; PMCID: PMC7944117.
- 504 33. Ferdous MZ, Islam MS, Sikder MT, Mosaddek AS, Zegarra-Valdivia JA, Gozal D. Knowledge,  
505 attitude, and practice regarding COVID-19 outbreak in Bangladesh: An online-based cross-  
506 sectional study. *PloS one*. 2020; 15 (10):e0239254. <https://doi.org/10.1371/journal.pone.0239254>
- 507
- 508 34. Banik R, Rahman M, Sikder MT, Rahman QM, & Pranta MUR. Knowledge, attitudes, and  
509 practices related to the COVID-19 pandemic among Bangladeshi youth: a web-based cross-  
510 sectional analysis. *J Public Health (Berl.)* 2021; <https://doi.org/10.1007/s10389-020-01432-7>
- 511 35. Taş BG, Selvi HR, Öztürk GZ, Arıca SG, Eğici MT. Evaluation of Knowledge, Practices, and  
512 Attitudes towards Coronavirus in Individuals Aged 20-64 Years. *Hamidiye Med J* 2022;3(1):59-  
513 66, DOI: 10.4274/hamidiyemedj.galenos.2021.83703
- 514 36. Fan ZY, Mou YL, Cheng R, Zhao Y, Zhang F. Investigation of Knowledge, Attitude and  
515 Practice of Personal Protection Among Different Types of Workers Returning to Work Under  
516 COVID-19 Epidemic. *Front. Public Health*. 2021; 7 (9):679699. doi:  
517 10.3389/fpubh.2021.679699

- 518 37. Gao H, Hu R, Yin L, Yuan X, Tang H, Luo L, Chen M, Huang D, Wang Y, Yu A, Jiang Z.  
519 Knowledge, attitudes and practices of the Chinese public with respect to coronavirus disease  
520 (COVID-19): an online cross-sectional survey. BMC Public Health. 2020 ;20 (1): 1-8. doi:  
521 10.1186/s12889-020-09961-2. PMID: 33256707; PMCID: PMC7702204.
- 522 38. Chai CS, Ng DLC, Chua WJ, Tung YZ, Sindeh W, Ibrahim MA, Badlishah Sham SF, Tan SB.  
523 Knowledge, Attitude, and Practices Among the General Population During the Later Stage of the  
524 COVID-19 Pandemic in Malaysia: A Cross-Sectional Study. Risk Manag Healthc Policy.  
525 2022;15:389-401 <https://doi.org/10.2147/RMHP.S349798>
- 526 39. Moradzadeh R, Nazari J, Shamsi M and Amini S. Knowledge, Attitudes, and Practices Toward  
527 Coronavirus Disease 2019 in the Central Area of Iran: A Population-Based Study. Front. Public  
528 Health 2020; 8:599007. doi: 10.3389/fpubh.2020.599007
- 529 40. Sujarwoto S, Holipah H, Maharani A. A Cross-Sectional Study of Knowledge, Attitudes, and  
530 Practices concerning COVID-19 Outbreaks in the General Population in Malang District,  
531 Indonesia. Int. J. Environ. Res. Public Health 2022; 19 (7), 4287.  
532 <https://doi.org/10.3390/ijerph19074287>
- 533 41. Ngwewondo A, Nkengazong L, Ambe LA, Ebogo JT, Mba FM, Goni HO, et al. (2020)  
534 Knowledge, attitudes, practices of/towards COVID 19 preventive measures and symptoms: A  
535 cross-sectional study during the exponential rise of the outbreak in Cameroon. PLoS Negl Trop  
536 Dis 14(9): e0008700.<https://doi.org/10.1371/journal.pntd.0008700>
- 537 42. Honardoost M, Janani L, Aghili R, Emami Z, Khamseh ME. The association between presence  
538 of comorbidities and COVID-19 severity: a systematic review and meta-analysis.  
539 Cerebrovascular Diseases. 2021; 50 (2):132-40.<https://doi.org/10.1159/000513288>
- 540 43. Shah P, Shah S, Shah L, Giri SS, Kushwaha SP, Chaurasia L. Perception and Practice Regarding  
541 Prevention of COVID-19 among Community People During and After Lockdown. MedS  
542 Alliance Journal of Medicine and Medical Sciences. 2021; 1(1):25-31.  
543 <https://doi.org/10.3126/mjmms.v1i1.42942>

- 544 44. Cerdá-Mansilla E, Rubio N, Campo S. Viralization keys of messages in unofficial accounts  
545 during crisis periods: the case of Covid-19 on Twitter. Spanish Journal of Marketing-ESIC.  
546 2021; 25 (1):137-155.
- 547 45. Tasnim S, Hossain MM, Mazumder H. Impact of rumors and misinformation on COVID-19 in  
548 social media. Journal of preventive medicine and public health. 2020; 53 (3):171-4.  
549 <https://doi.org/10.3961/jpmph.20.094>
- 550 46. Caceres MM, Sosa JP, Lawrence JA, Sestacovschi C, Tidd-Johnson A, Rasool MH, Gadamidi  
551 VK, Ozair S, Pandav K, Cuevas-Lou C, Parrish M, Rodriguez I, Fernandez JP. The impact of  
552 misinformation on the COVID-19 pandemic. AIMS Public Health. 2022; 9 (2):262.
- 553 47. Kassa AM, Mekonen AM, Yesuf KA, Tadesse AW, Bogale GG. Knowledge level and factors  
554 influencing prevention of COVID-19 pandemic among residents of Dessie and Kombolcha City  
555 administrations, North- East Ethiopia: a population- based cross- sectional study. BMJ Open.  
556 2020; 10 (11): e044202. doi:10.1136/ bmjopen-2020-044202
- 557 48. Davidson DJ, Freudenburg WR. Gender and Environmental Risk Concerns: A Review and  
558 analysis of available Research. Environment and Behavior. 1996; 28(3):302-339.  
559 doi:10.1177/0013916596283003
- 560 49. Deeks A, Lombard C, Michelmore J, Teede H. The effects of gender and age on health related  
561 behaviors. BMC Public Health 2009; 9(1):1-8.. <https://doi.org/10.1186/1471-2458-9-213>
- 562 50. Khanal, U. Socio-Economic Status of Women on Tharu's Community in Nepalese Society. Social  
563 Science Humanities and Sustainability Research. 2021; 2 (3) 10.
- 564 51. Central Bureau of Statistics, Government of Nepal. Population Monograph of Nepal. 2014.  
565 Available from: [https://nepal.unfpa.org/sites/default/files/pub-](https://nepal.unfpa.org/sites/default/files/pub-pdf/Population%20Monograph%20V02.pdf)  
566 [pdf/Population%20Monograph%20V02.pdf](https://nepal.unfpa.org/sites/default/files/pub-pdf/Population%20Monograph%20V02.pdf)
- 567 52. Gaziano C. Knowledge Gaps, Belief Gaps, Ideology, and Culture Wars. Open Journal of Political  
568 Science. 2013; 3 (04):116-130. doi: 10.4236/ojps.2013.34017.



- 569 53. Rimal, RN, & Lapinski, MK. Why health communication is important in public health. Bulletin  
570 of the World Health Organization. 2009; 87(4), 247–247a. <https://doi.org/10.2471/blt.08.056713>
- 571 54. Ministry of Health and Population, Government of Nepal. Guideline for Mobilization of COVID-  
572 19 Facilitation Group at Community level. 2020. Available from:  
573 [https://drive.google.com/file/d/1L4SmmCha-Fzm8FZl9dsJGcDHdX\\_q-Frd/view](https://drive.google.com/file/d/1L4SmmCha-Fzm8FZl9dsJGcDHdX_q-Frd/view) (Title in Nepali  
574 language, translated in English)
- 575 55. Ministry of Health and Population, Government of Nepal. Public Health Standards Regarding  
576 COVID-19 during Festivals and Celebrations. 2020. Available from:  
577 [https://drive.google.com/file/d/17ali-HL\\_kiUEX0i4Q-MLJwgOhCEz77di/view](https://drive.google.com/file/d/17ali-HL_kiUEX0i4Q-MLJwgOhCEz77di/view) (Title in Nepali  
578 language, translated in English)
- 579 56. Ministry of Health and Population, Government of Nepal. COVID-19 Micro Containment Plan.  
580 2021. Available from: [https://drive.google.com/file/d/114kDPwYqPH2H2-  
581 jU9gQfq1Bh1iFmEwP5/view](https://drive.google.com/file/d/114kDPwYqPH2H2-jU9gQfq1Bh1iFmEwP5/view)
- 582 57. Ministry of Health and Population, Government of Nepal. Environmental Cleaning and  
583 Disinfection Interim Guidance in the context of COVID-19. 2020. Available from:  
584 [https://drive.google.com/file/d/1ux1Vm6ps9ZnbUp3nB6BqgYhNjvatFn\\_/view](https://drive.google.com/file/d/1ux1Vm6ps9ZnbUp3nB6BqgYhNjvatFn_/view) (Title in Nepali  
585 language, translated in English)
- 586 58. Ministry of health and Population, Government of Nepal. Guideline on Distribution of Isolation  
587 Kits for Home Isolation Cases. 2020. Available from:  
588 <https://drive.google.com/file/d/1HcOJ3rx41tYGzXuSOBgO5LfKGDz6D5kR/view> (Title in  
589 Nepali language, translated in English)
- 590 59. Cislighi B, Heise L. Using social norms theory for health promotion in low-income countries.  
591 Health promotion international. 2019; 34 (3): 616-623. doi: 10.1093/heapro/day017.
- 592 60. Cucchiarini V, Caravona L, Macchi L, Perlino FL, Viale R. Behavioral Changes After the  
593 COVID-19 Lockdown in Italy. Front Psychol. 2021;12:617315. doi: 10.3389/fpsyg.2021.617315.  
594 .
